# Supplementary material
Source: Royal Society of Chemistry journal article supplement (doi:10.1039/d6cy00135a)
Supplement: d6cy00135a1.pdf [file d6cy00135a1.pdf]

## Supporting Information

### Adsorption or photocatalysis?

#### **Engineering BiOI with metalorganic framework CAU-17 and microporous organic polymer MOP-CH2EDA to enhance ciprofloxacin removal from water**

Sepideh G. Khasevani<sup>a</sup>, Saulius Kaciulis<sup>b</sup>, Alessio Mezzi<sup>b</sup>, Shokat Sarmad<sup>c</sup>, Jyri-Pekka Mikkola<sup>c</sup>,  
Dariush Nikjoo<sup>a</sup>, Isabella Concina<sup>a</sup>

<sup>a</sup>Department of Engineering Sciences and Mathematics, Luleå University of Technology, 98187 Luleå,  
Sweden

<sup>b</sup>Institute for the Study of Nanostructured Materials, ISMN-CNR, 00015 Monterotondo  
Stazione, Roma, Italy

<sup>c</sup>Technical Chemistry, Department of Chemistry, Chemical-Biological Centre, Umeå University, SE-  
90871 Umeå, Sweden

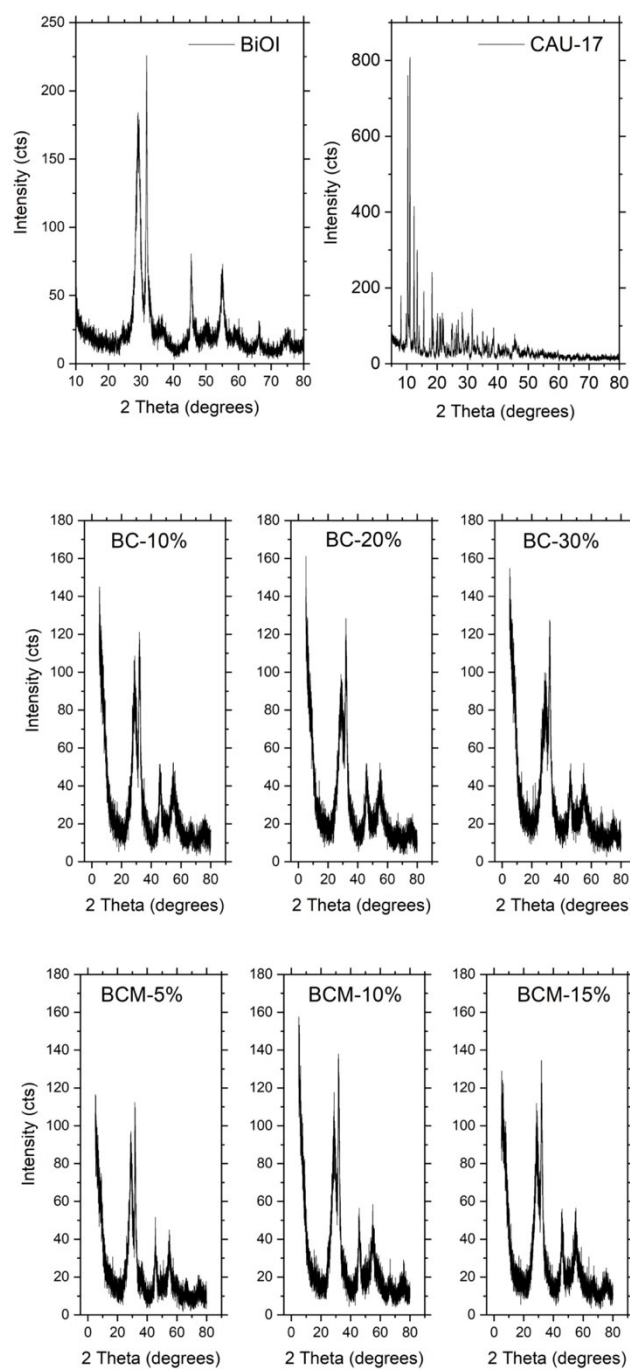

Figure S1. XRD patterns of the materials under investigation.

Prominent diffraction peaks of CAU-17:  $2\theta = 7.48^\circ, 9.947^\circ, 10.72^\circ, 11.23^\circ, 12.91^\circ, 13.3^\circ, 14.25^\circ, 16.99^\circ,$  and  $24.073^\circ$ . Main diffraction peaks of the tetragonal BiOI structure:  $2\theta = 29.64^\circ, 31.66^\circ, 45.67^\circ, 55.15^\circ,$  and  $65.1^\circ$  respectively [37].

| Sample                  | BET surface area (m <sup>2</sup> /g) | Pore Volume average (mm <sup>3</sup> /g) | Pore Size average (nm) |
|-------------------------|--------------------------------------|------------------------------------------|------------------------|
| BiOI                    | 40.2                                 | 56                                       | 4.1                    |
| CAU-17                  | 5.8                                  | 3.9                                      | 4.8                    |
| MOP-CH <sub>2</sub> EDA | 684.2                                | 640                                      | 5.1                    |
| BC-10%                  | 55.7                                 | 97.6                                     | 5.4                    |
| BC-20%                  | 54.7                                 | 95.1                                     | 5.4                    |
| BC-30%                  | 35.9                                 | 79.8                                     | 6.3                    |
| BCM- 5%                 | 24.9                                 | 46.4                                     | 6.1                    |
| BCM -10%                | 63.9                                 | 56                                       | 5.7                    |
| BCM-15%                 | 48.7                                 | 83.5                                     | 5.5                    |

Table S 1. Surface area and pore analysis of the prepared samples as retrieved from BET measurements.

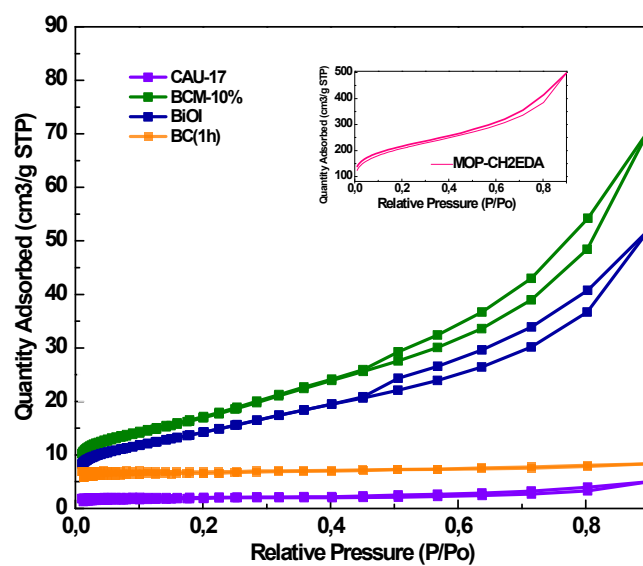

Figure S 2. Nitrogen adsorption-desorption isotherms for as-prepared materials.

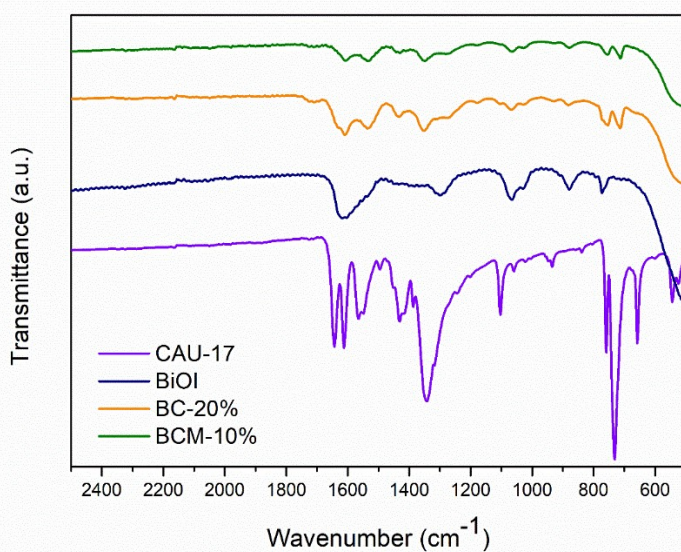

Figure S 3. FTIR spectra of the prepared materials.

| Materials | Wavenumber (cm <sup>-1</sup> ) | Vibration                                                         |
|-----------|--------------------------------|-------------------------------------------------------------------|
| BiOI      | 512                            | $\nu_{\text{sym}}$ Bi-O                                           |
|           | 722                            | $\nu_{\text{asym}}$ Bi-O                                          |
|           | 1385                           | $\nu$ Bi-I                                                        |
|           | 1650                           | $\delta$ O-H                                                      |
|           | 3450                           | $\nu$ O-H                                                         |
| CAU-17    | 400-800                        | O-Bi-O                                                            |
|           | 1100                           | $\nu$ C-H (benzene ring)                                          |
|           | 1400                           | $\nu$ C-C (benzene ring)                                          |
|           | 1373 and 1450                  | $\delta_{\text{sym}}$ and $\delta_{\text{asym}}$ COO <sup>-</sup> |
|           | 1550 and 1650                  | $\nu_{\text{sym}}$ and $\nu_{\text{asym}}$ COO <sup>-</sup>       |

Table S 2. IR correlation table.

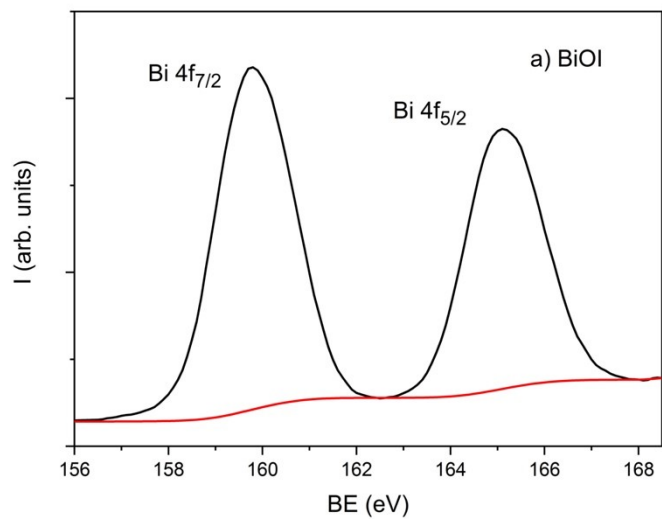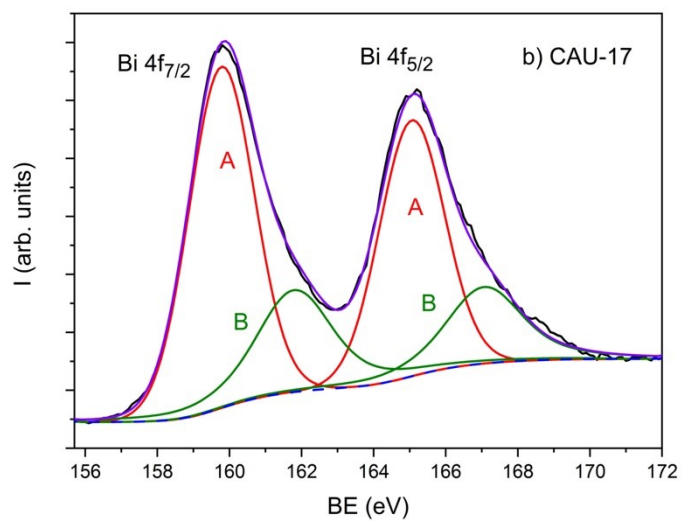

Figure S 4. Bi 4f photoemission spectra of the samples BiOI (a) and CAU-17 (b).

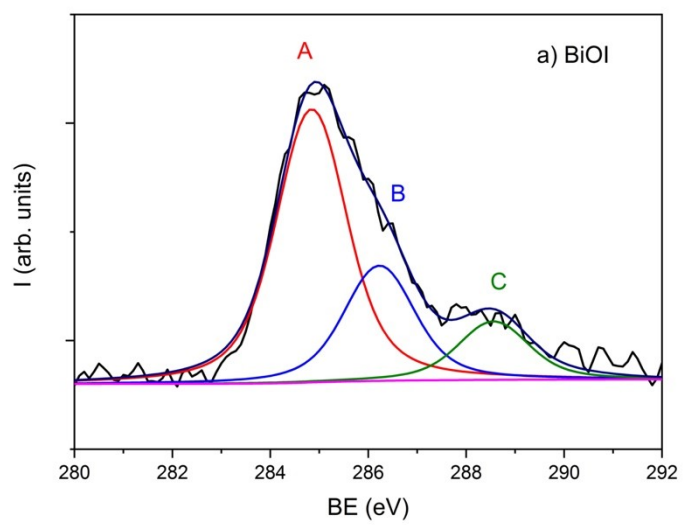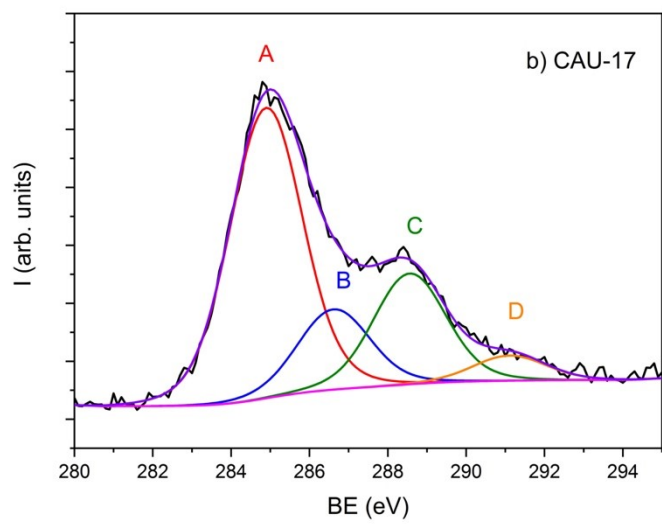

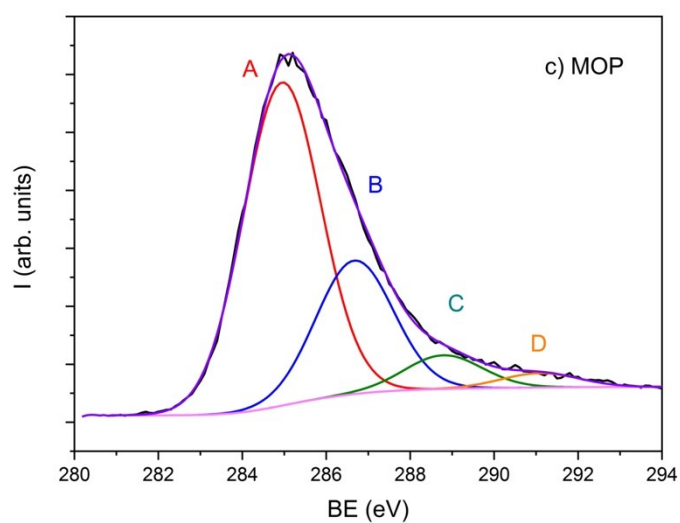

Figure S 5. C 1s photoemission spectra of the samples (a) BiOI, (b) CAU-17 and (c) MOP-CH2EDA.

| Peak                 | BE (eV) | FWHM (eV) | Atomic % | State                                             |
|----------------------|---------|-----------|----------|---------------------------------------------------|
| Bi 4f <sub>7/2</sub> | 160.0   | 1.9       | 23.4     | Bi <sub>2</sub> O <sub>3</sub> , BiI <sub>3</sub> |
| C 1s - A             | 285.0   | 1.7       | 22.1     | aliphatic                                         |
| C 1s - B             | 286.4   | 1.7       | 9.4      | C-O                                               |
| C 1s - C             | 288.7   | 1.7       | 4.8      | -C=O                                              |
| I 3d <sub>5/2</sub>  | 619.2   | 1.7       | 13.9     | iodide                                            |
| O 1s - A             | 530.3   | 1.8       | 13.3     | oxides                                            |
| O 1s - B             | 531.9   | 1.8       | 10.1     | OH <sup>-</sup> , C-O                             |
| O 1s - C             | 533.3   | 1.8       | 2.7      | -C=O                                              |

Table S 3. XPS quantification tables with chemical state of the species for the samples BiOI

| Peak                     | BE (eV) | FWHM (eV) | Atomic % | State                          |
|--------------------------|---------|-----------|----------|--------------------------------|
| Bi 4f <sub>7/2</sub> - A | 159.8   | 2.2       | 5.6      | Bi <sub>2</sub> O <sub>3</sub> |
| Bi 4f <sub>7/2</sub> - B | 161.8   | 2.5       | 2.3      | Bi-O-C as in Bi                |

|          |       |     |      |                       |
|----------|-------|-----|------|-----------------------|
|          |       |     |      | acetate, see ref. [x] |
| C 1s - A | 285.0 | 2.2 | 36.2 | aliphatic             |
| C 1s - B | 286.6 | 2.2 | 10.0 | C-O                   |
| C 1s - C | 288.6 | 2.2 | 13.8 | -C=O                  |
| C 1s - D | 291.1 | 2.2 | 3.1  | carbonate             |
| N 1s     | 401.0 | 3.3 | 2.2  | C-N, C-N-H            |
| O 1s - A | 531.0 | 2.2 | 22.1 | oxides                |
| O 1s - B | 532.8 | 2.2 | 4.6  | -C=O                  |

Table S 4. XPS quantification tables with chemical state of the species for the sample CAU-17.

| Peak                 | BE (eV) | FWHM (eV) | Atomic % | State                  |
|----------------------|---------|-----------|----------|------------------------|
| C 1s - A             | 285.0   | 2.2       | 55.3     | aliphatic              |
| C 1s - B             | 286.7   | 2.2       | 22.8     | C-O                    |
| C 1s - C             | 288.8   | 2.2       | 5.8      | -C=O                   |
| C 1s - D             | 291.1   | 2.2       | 2.4      | carbonate              |
| Cl 2p <sub>3/2</sub> | 201.0   | 3.0       | 0.6      | Cl <sup>-</sup>        |
| N 1s - A             | 399.4   | 2.9       | 3.9      | C-N, NH <sub>2</sub>   |
| O 1s - A             | 532.4   | 2.7       | 6.7      | OH <sup>-</sup> , -C=O |
| O 1s - B             | 534.0   | 2.7       | 2.0      | -C-O                   |
| P 2p <sub>3/2</sub>  | 133.4   | 3.0       | 0.4      | phosphate              |

Table S 5. XPS quantification tables with chemical state of the species for the sample MOP-CH2EDA.

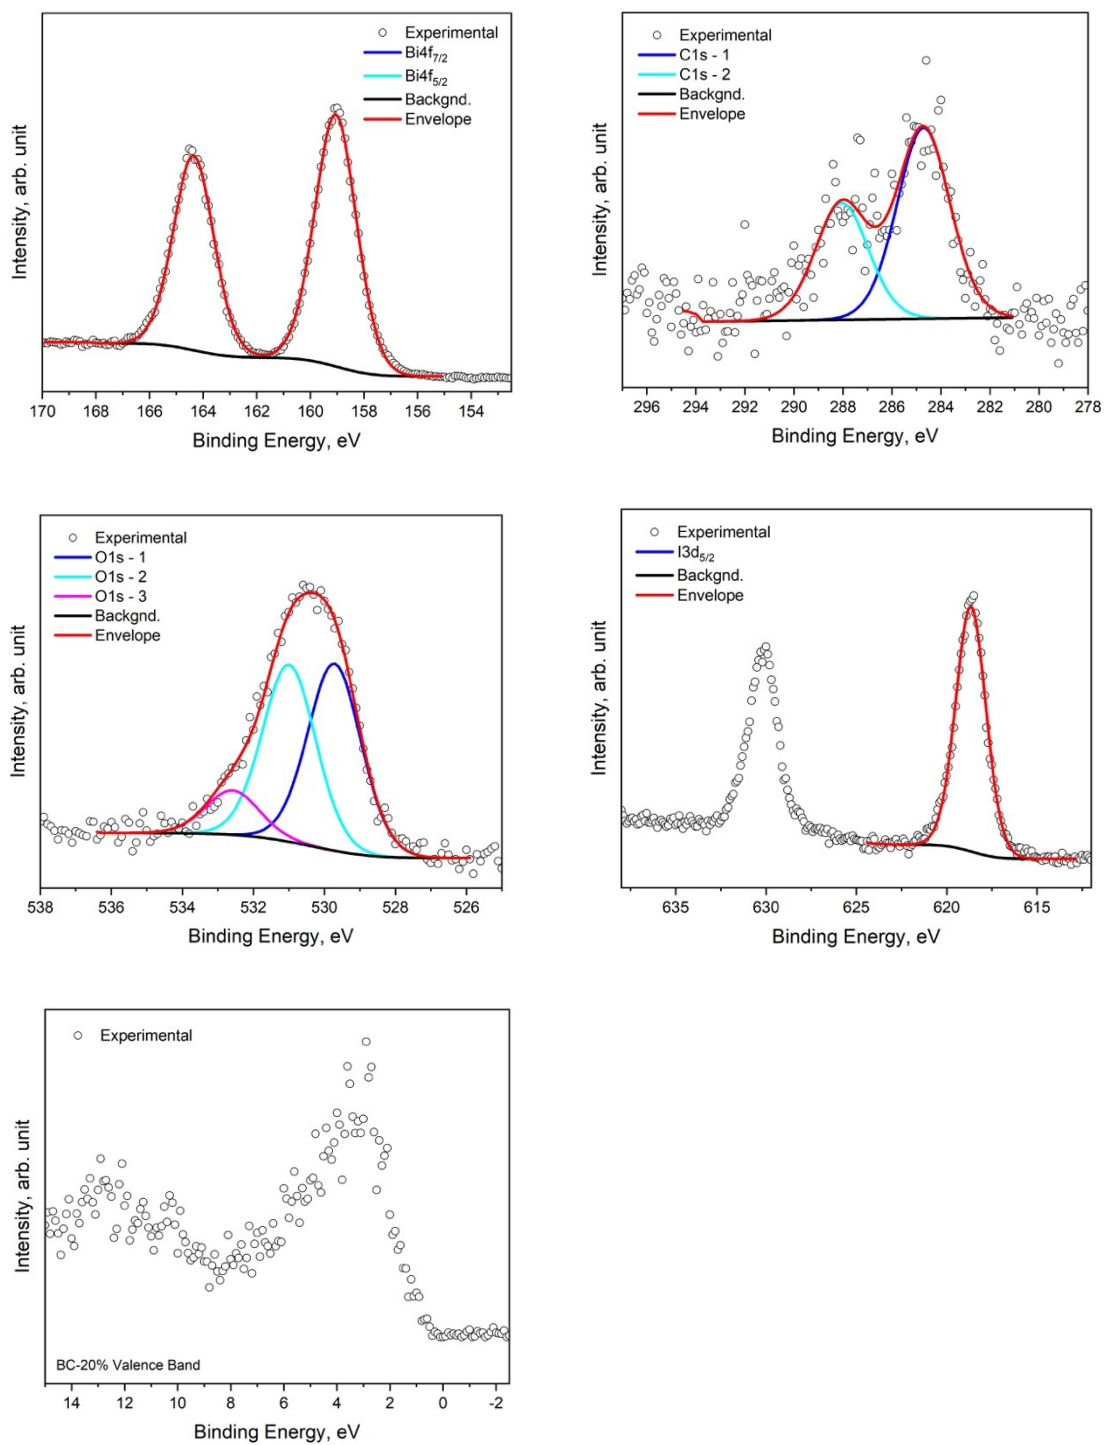

Figure S 6. XPS spectra of the composite BC-20%.

| Peak    | Peak BE (eV) | FWHM eV | Atomic % | State                          |
|---------|--------------|---------|----------|--------------------------------|
| Bi4f7   | 159.4        | 1.83    | 22.1     | Bi <sub>2</sub> O <sub>3</sub> |
| C1s - 1 | 285.0        | 2.55    | 22.1     | Aliphatic                      |

|         |       |      |      |                  |
|---------|-------|------|------|------------------|
| C1s - 2 | 288.4 | 2.55 | 13.5 | -C=O             |
| I3d5    | 619.0 | 1.96 | 9.8  | iodide           |
| O1s - 1 | 530.0 | 1.77 | 14.9 | oxides           |
| O1s - 2 | 531.3 | 1.77 | 14.1 | OH-, C-O         |
| O1s - 3 | 532.7 | 1.77 | 3.5  | H <sub>2</sub> O |

*Table S 6. XPA quantification for the composite BC-20%.*

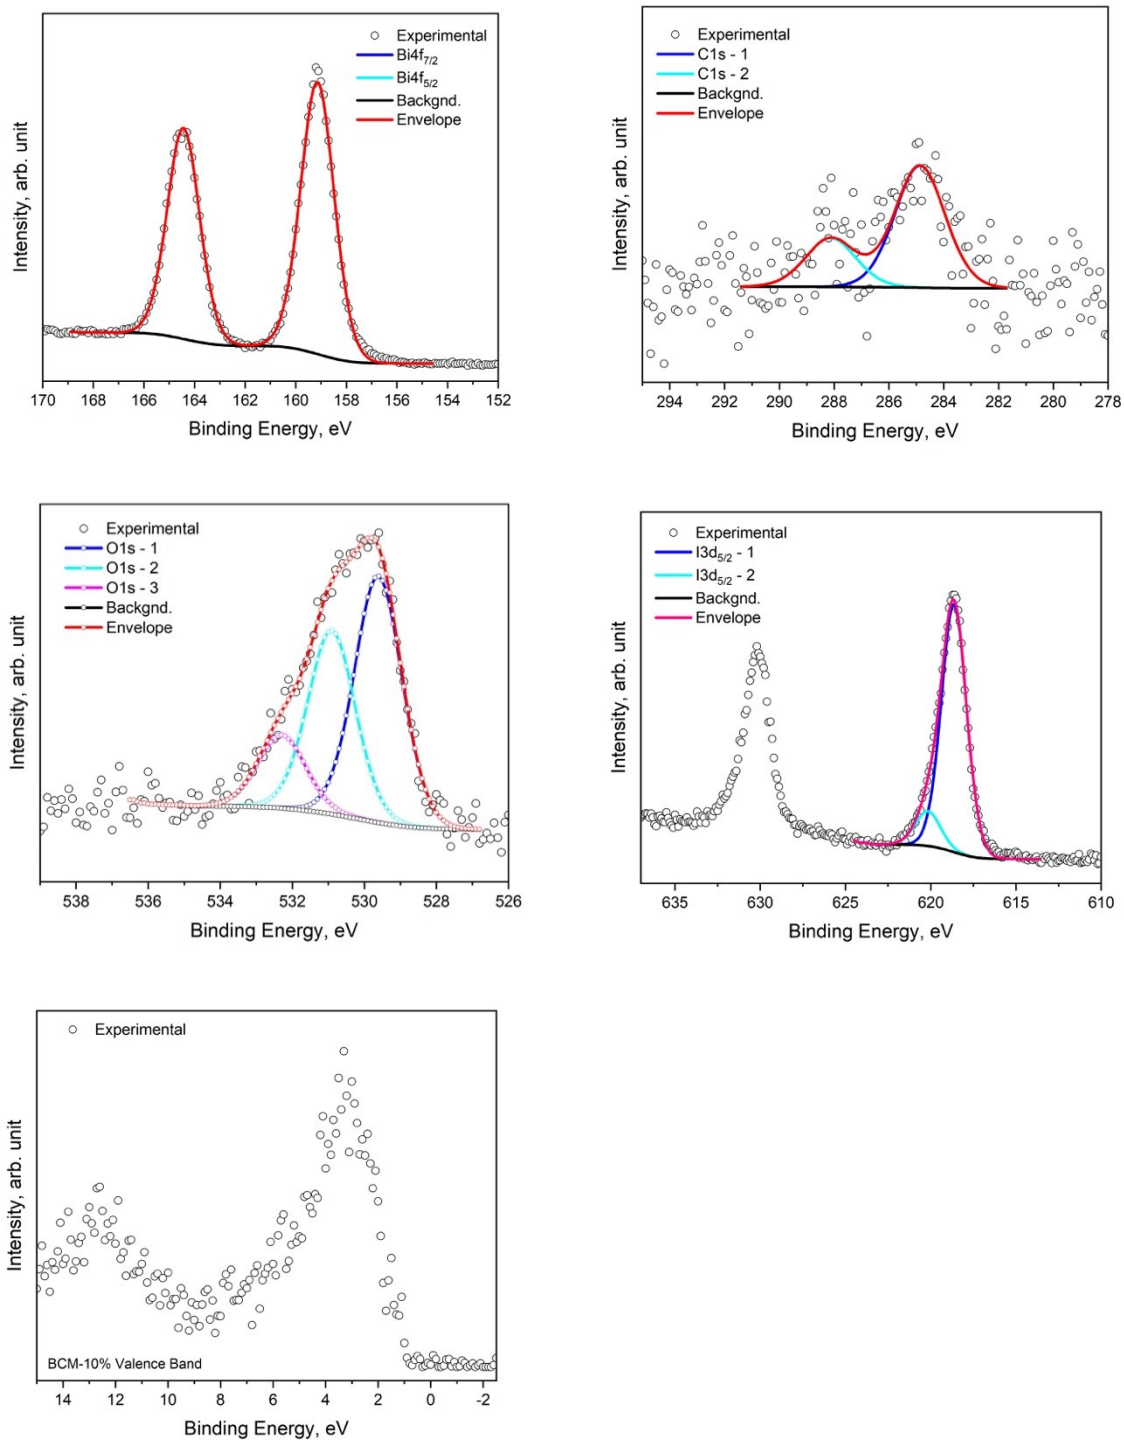

Figure S 7-XPS spectra of the composite BCM-10%.

| Peak    | Peak BE (eV) | FWHM eV | Atomic % | State                          |
|---------|--------------|---------|----------|--------------------------------|
| Bi4f7   | 159.2        | 1.56    | 28.6     | Bi <sub>2</sub> O <sub>3</sub> |
| C1s - 1 | 285.0        | 2.16    | 14.5     | Aliphatic                      |

|          |       |      |      |                       |
|----------|-------|------|------|-----------------------|
| C1s - 2  | 288.2 | 2.16 | 5.8  | -C=O                  |
| I3d5 - 1 | 618.7 | 1.73 | 15.3 | iodide                |
| I3d5 - 2 | 620.2 | 1.73 | 2.1  |                       |
| O1s - 1  | 529.7 | 1.55 | 16.5 | oxides                |
| O1s - 2  | 531.0 | 1.55 | 12.3 | OH <sup>-</sup> , C-O |
| O1s - 3  | 532.4 | 1.55 | 4.9  | H <sub>2</sub> O      |

*Table S 7. XPS quantification of of the composite BCM-10%.*

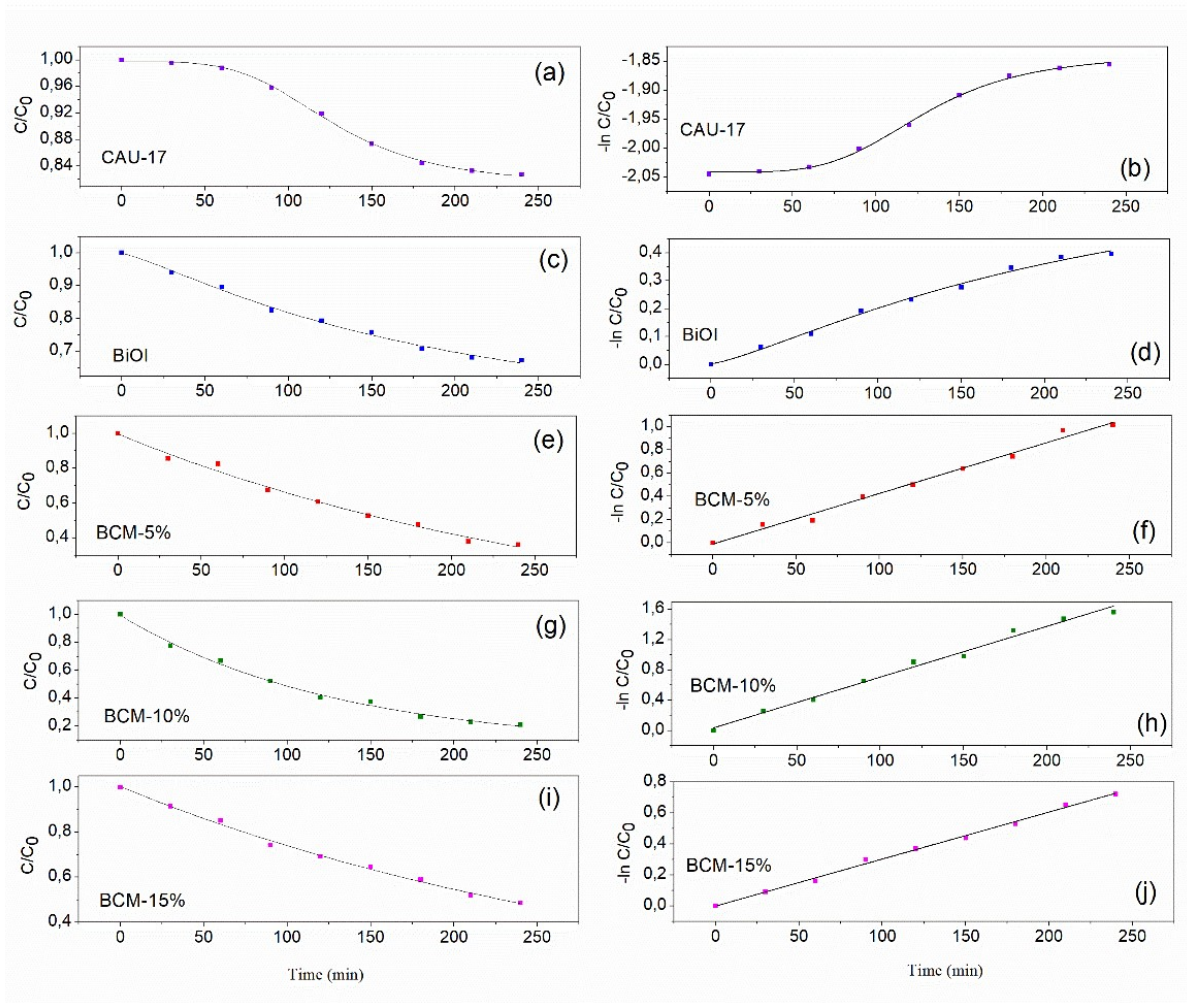

Figure S 8. Reaction course for the degradation of CIP upon light irradiation for pure CAU-17 (a-b), BiOI (b-c) and the ternary composites (e-g). Markers are experimental points, lines are fitting curves.

Table S 8. Fitting parameters of plots,  $C_t/C_0$  and  $\ln C_t/C_0$  vs Time, for CIP degradation for pure BiOI, CAU-17, and the ternary composites.

| Sample                                                                                                                                                                                                              | $C_t/C_0$ vs Time |                                                                                          | $\ln C_t/C_0$ vs Time |                                                                                           |
|---------------------------------------------------------------------------------------------------------------------------------------------------------------------------------------------------------------------|-------------------|------------------------------------------------------------------------------------------|-----------------------|-------------------------------------------------------------------------------------------|
|                                                                                                                                                                                                                     | Fitting Equations | Fitting parameters                                                                       | Fitting Equations     | Fitting parameters                                                                        |
| CAU-17                                                                                                                                                                                                              | sigmoidal         | A1 = 0,9972<br>A2 = 0,8123<br>x0 = 126,5179<br>p = 4,0683<br>R <sup>2</sup> = 0,9977     | sigmoidal             | A1 = -2.0417<br>A2 = -1.83813<br>x0 = 129.3595<br>p = 4.13575<br>R <sup>2</sup> = 0.99778 |
| BiOI                                                                                                                                                                                                                | sigmoidal         | A1 = 0.99848<br>A2 = 0.41821<br>x0 = 188.35225<br>p = 1.25727<br>R <sup>2</sup> = 0.9927 | sigmoidal             | A1 = 0.0023<br>A2 = 0.79818<br>x0 = 233.33609<br>p = 1.2967<br>R <sup>2</sup> = 0.99175   |
| BCM-5%                                                                                                                                                                                                              | exponential       | Y0 = -0.1770<br>A1 = 1.1727<br>t1 = 298.498<br>R <sup>2</sup> = 0.9871                   | Linear                | a = -0.01122<br>b = 0.00436<br>R <sup>2</sup> = 0.98829                                   |
| BCM-10%                                                                                                                                                                                                             | exponential       | Y0 = 0.0527<br>A1 = 0.9409<br>t1 = 129.0638<br>R <sup>2</sup> = 0.9935                   | Linear                | a = 0.03388<br>b = 0.00671<br>R <sup>2</sup> = 0.98885                                    |
| BCM-15%                                                                                                                                                                                                             | exponential       | Y0 = -0.00065<br>A1 = 1.0024<br>t1 = 329.7704<br>R <sup>2</sup> = 0.9949                 | Linear                | a = -0.00179<br>b = 0.00304<br>R <sup>2</sup> = 0.9956                                    |
| <p>Fitting equations:</p> <p>Linear: <math>y = a + bx</math></p> <p>Exponential: <math>y = y_0 + A_1 e^{-\frac{x}{t_1}}</math></p> $y = \frac{A_1 - A_2}{1 + \left(\frac{x}{x_0}\right)^p} + A_2$ <p>Sigmoidal:</p> |                   |                                                                                          |                       |                                                                                           |

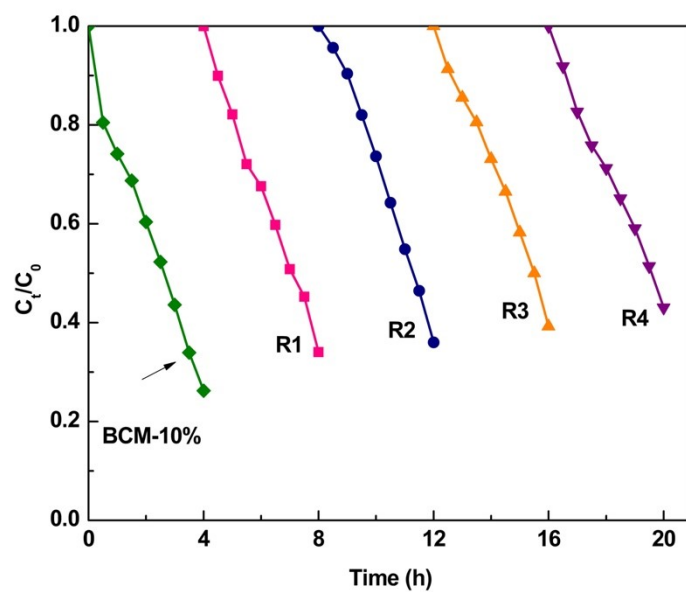

Figure S 9. Recycling efficiency of the photocatalyst BCM-10%.

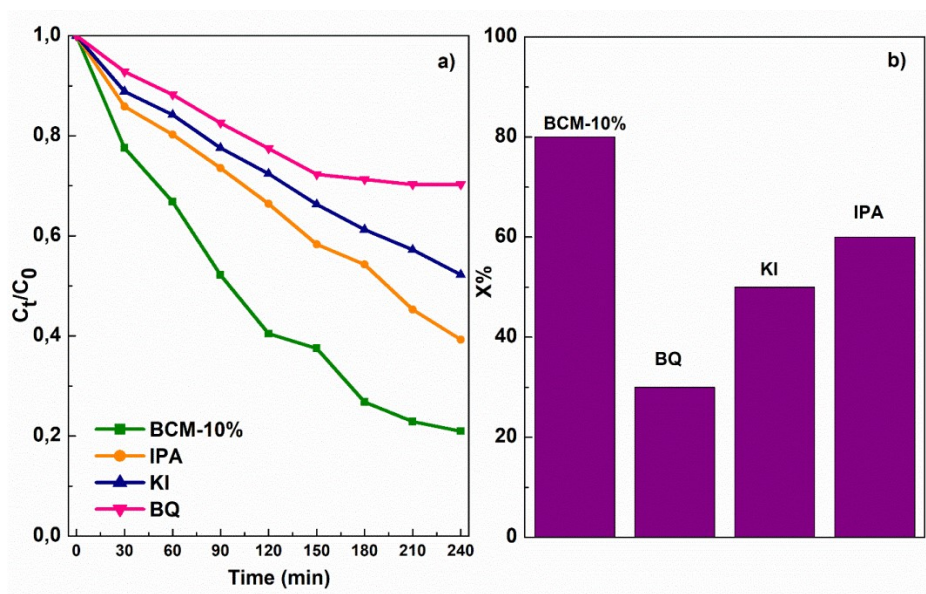

Figure S 10. Results of the catalytic tests carried out with the addition of scavengers. (a) Reaction course plotted as  $C_t/C_0$  vs. time and (b) degradation percentage as a function of the specific scavenger.

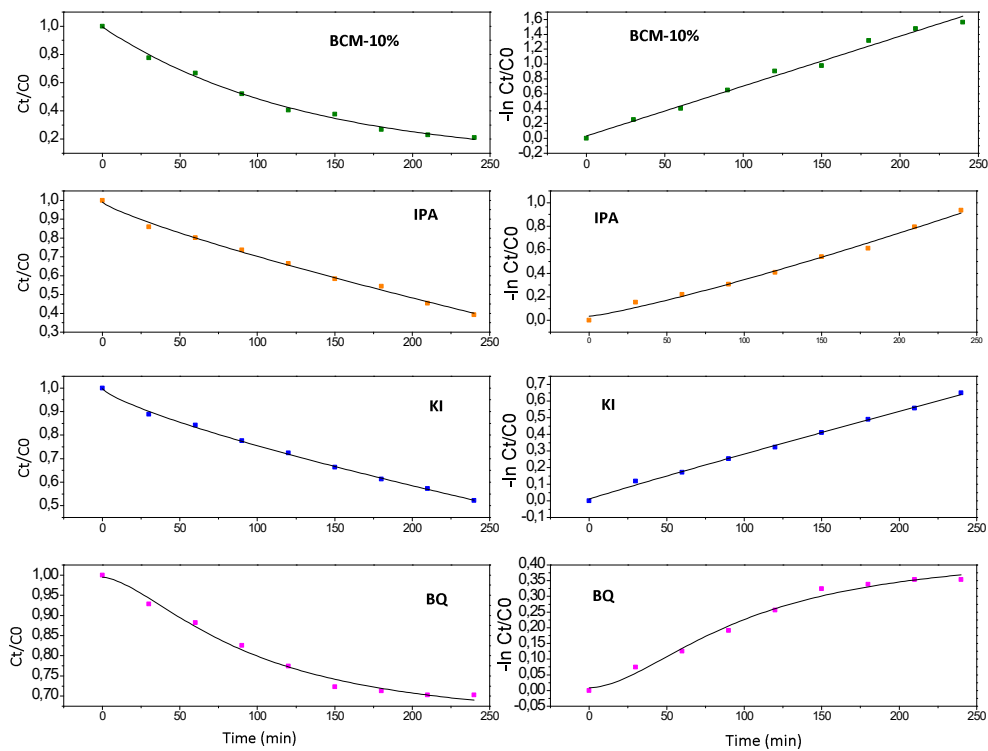

Figure S 11. Reaction course for the degradation of CIP upon light irradiation for BCM-10%, and with the addition of different IPA, KI and BQ scavengers. Markers are experimental points, lines are fitting curves.

| Sample                       | $C_t/C_0$ vs. Time |                                                                          | $-\ln C_t/C_0$ vs. Time |                                                                          |
|------------------------------|--------------------|--------------------------------------------------------------------------|-------------------------|--------------------------------------------------------------------------|
|                              | Fitting Equations  | Fitting parameters                                                       | Fitting Equations       | Fitting parameters                                                       |
| BCM-10%                      | exponential        | Y0 = 0.0527<br>A1 = 0.9409<br>t1 = 129.0638<br>R2 = 0.9935               | Linear                  | a = 0.03388<br>b = 0.00671<br>R2 = 0.98885                               |
| BCM-10%,<br>scavenger<br>IPA | sigmoidal          | A1 = 0.9906<br>A2 = -3911.81<br>x0 = 1.1212<br>p = 0.8183<br>R2 = 0.9929 | sigmoidal               | A1 = 0.0341<br>A2 = 25340,32<br>x0 = 1.4062<br>p = 1.1837<br>R2 = 0.9864 |
| BCM-10%,<br>scavenger<br>KI  | sigmoidal          | A1 = 0.9970<br>A2 = -413.77<br>x0 = 1.6435<br>p = 0.7669<br>R2 = 0.9974  | sigmoidal               | A1 = 0.0101<br>A2 = 49580.97<br>x0 = 2.9581<br>p = 0.9616<br>R2 = 0.9960 |
| BCM-10%,<br>scavenger<br>BQ  | sigmoidal          | A1 = 0.9949<br>A2 = 0.6198<br>x0 = 94.5863<br>p = 1.5835<br>R2 = 0.9833  | sigmoidal               | A1 = 0.0086<br>A2 = 0.4469<br>x0 = 100.9006<br>p = 1.7575<br>R2 = 0.9819 |

Table S 9. Fitting parameters of plots,  $C_t/C_0$  and  $\ln C_t/C_0$  vs Time for CIP degradation with the addition of scavengers For BCM-10% ternary composites

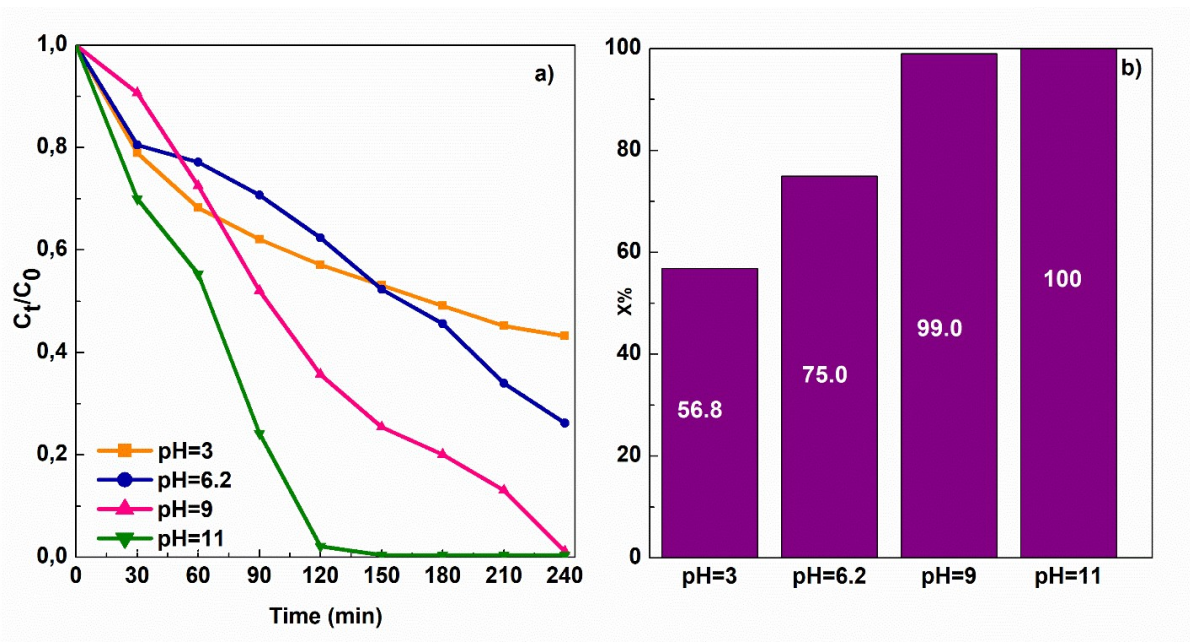

Figure S 12. Effect of pH on CIP photodegradation promoted by BCM-10%:(a) reaction course plotted as  $C_t/C_0$  vs. time and (b) removal efficiency at different pHs after 240 min reaction.

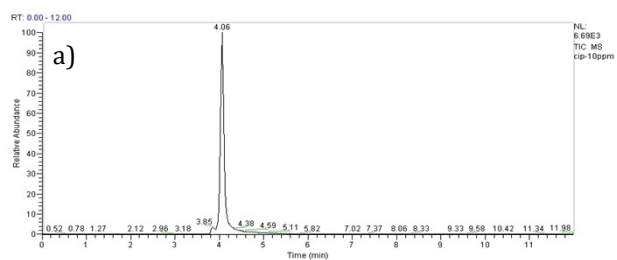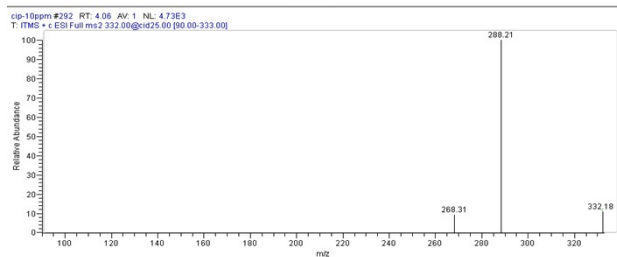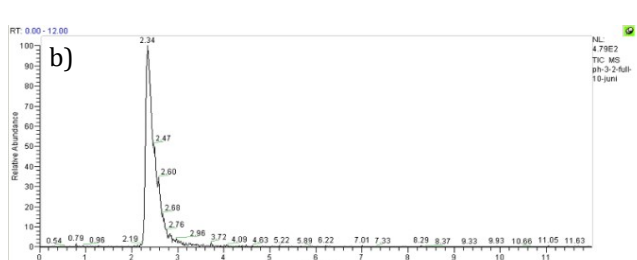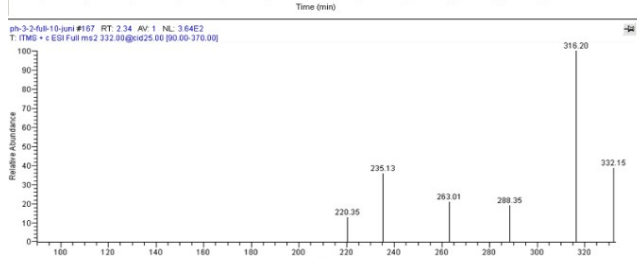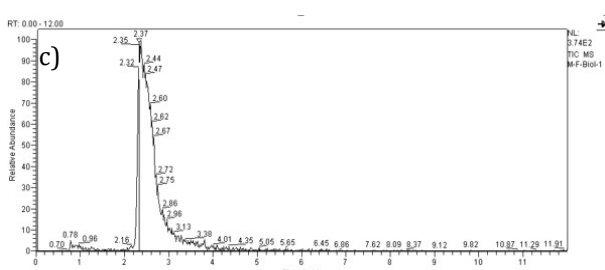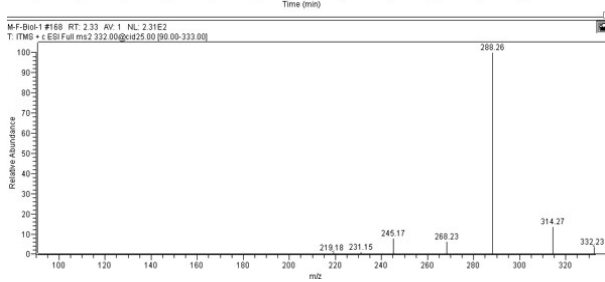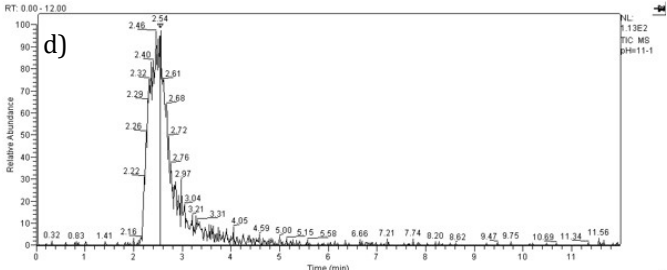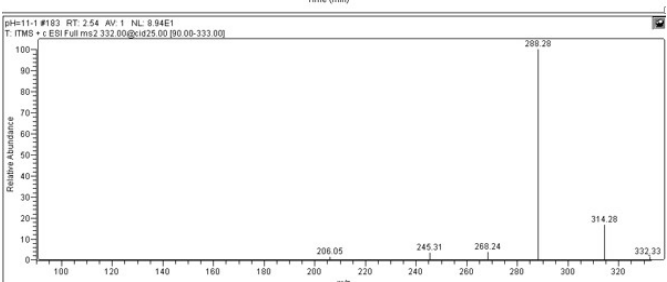

Figure S 13. Chromatograms and MS patterns pertaining to a) CIP and catalytic CIP degradation promoted by the ternary composite BCM-10% under simulated solar light at different pHs: b) pH= 3, c) pH = 6.2, d) pH=9,11.
